# Supplementary material
Source: PubMed Central journal article supplement (PMC2409374)
Supplement: NIHMS40907-supplement-01.pdf [file NIHMS40907-supplement-01.pdf]

Structure 16

Supplemental Data

Protein Structure Fitting and Refinement

Guided by Cryo-EM Density

Maya Topf, Keren Lasker, Ben Webb, Haim Wolfson, Wah Chiu, and Andrej Sali

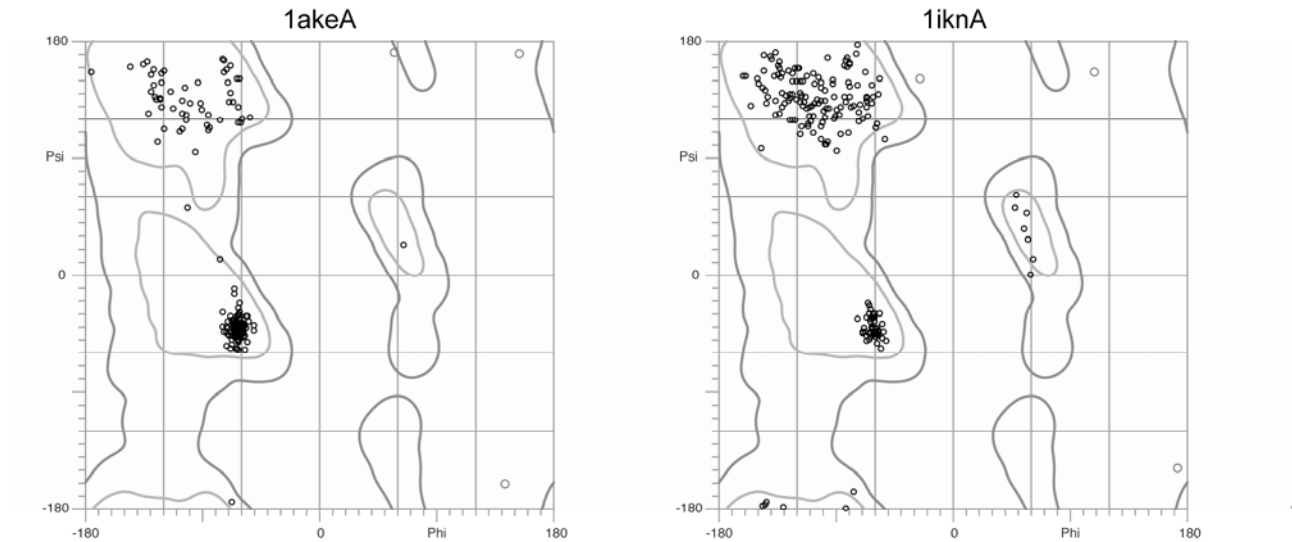

**Figure S1.** Ramachandran Plots of the Final Structures of the Single-Domain Protein 1akeA and the Two-Domain Protein 1iknA (Calculated with MOLprobity [Lovell, et al., 2003])

The average numbers of residues in the allowed regions for the ( $\Phi, \Psi$ ) dihedral angles are 98.6% and 98.8%, respectively, and in the favored regions are 96.7% and 96.8%, respectively.
